# Supplementary material for: High-Throughput Multiparallel Enteropathogen Detection via Nano-Liter qPCR
Source: Front Cell Infect Microbiol. 2020 Jul 15;10:351. doi: 10.3389/fcimb.2020.00351 (PMC7381150; doi:10.3389/fcimb.2020.00351)
Supplement: Supplementary file 1 [file Table_1.xlsx]

## Sheet: SyntheticStandards
Table S1. Synthetic constructs used as standards for nL-qPCR. 490bp synthetic standards were used as opposed to clinical isolates or ATCC strains to allow for a precise copy numbers to be added to a single standard pool containing identical quantities of each target. Each standard was derived from a specific GenBank accession. For assays developed under this project, the standard was derived from…
Organism	Gene Target	NCBI Reference Sequence from protein used for primer design	GenBank Accession used for synthetic gBlock construct	gBlock synthetic double-stranded linear nucleic acid template sequence	Notes
EAEC	aggR	YP_008766666.1/WP_000769457.1	CP003302	ATGAAATTAA AACAAAACAT CGAAAAAGAG ATTATAAAAA TTAACAATAT CAGAATACAT CAGTACACTG TACTATATAC ATCTAATTGT ACAATCGATG TATACACAAA AGAAGGAAGC AATACATATC TTAGAAATGA ACTCATATTT CTTGAGAGAG GAATAAATAT ATCAGTAAGA TTGCAAAAGA AGAAATCAAC AGTAAATCCA TTTATCGCAA TCAGATTAAG CAGCGATACA TTAAGACGCC TAAAGGATGC CCTGATGATA ATATACGGAA TATCAAAAGT AGATGCTTGC AGTTGTCCGA ATTGGTCAAA AGGAATAATT GTAGCTGATG CTGACGATTC TGTATTAGAT ACA…
ETEC	eltA	YP_003293997.1	CP000795	ACAAACCGGC TTTGTCAGAT ATGATGACGG ATATGTTTCC ACTTCTCTTA GTTTGAGAAG TGCTCACTTA GCAGGACAGT CTATATTATC AGGATATTCC ACTTACTATA TATATGTTAT AGCGACAGCA CCAAATATGT TTAATGTTAA TGATGTATTA GGCGTATACA GCCCTCACCC ATATGAACAG GAGGTTTCTG CGTTAGGTGG AATACCATAT TCTCAGATAT ATGGATGGTA TCGTGTTAAT TTTGGTGTGA TTGATGAACG ATTACATCGT AACAGGGAAT ATAGAGACCG GTATTACAGA AATCTGAATA TAGCTCCGGC AGAGGATGGT TACAGATTAG CAGGTTTCCC ACC…
ETEC	STp	AAA24653.1	M25607	ATGAAAAAGC TAATGTTGGC AATTTTTATT TCTGTATTAT CTTTCCCCTC TTTTAGTCAG TCAACTGAAT CACTTGACTC TTCAAAAGAG AAAATTACAT TAGAGACTAA AAAGTGTGAT GTTGTAAAAA ACAACAGTGA AAAAAAATCA GAAAATATGA ACAACACATT TTACTGCTGT GAACTTTGTT GTAATCCTGC CTGTGCTCCA TGTTATTAAG TGAAGTATAG GGACCCTGAG AAAAGCAGAA GCTGCTGTCT TTTGAGCTTA GACCATAACT GTTTGGGTTG GGGGGTCCTC ACATCCTTTT CTCTTTGAAG TTTCTTGGGT CAACCAGAGG GAACAGAAAC AAGCACCCTC CCC…
ETEC	STh	YP_006203851.1/WP_014654027.1	FN649418	ATGAAAAAAT CAATATTATT TATTTTTCTT TCTGTATTAT CTTTTTCACC TTTCGCTCAG GATGCTAAAC CAGCAGGGTC TTCAAAAGAA AAAATTACAC TAGAATCGAA AAAATGTAAC ATTGTAAAAA AAAATAATGA AAGTAGTCCT GAAAGCATGA ATAGTAGCAA TTACTGCTGT GAATTGTGTT GTAATCCTGC TTGTACCGGG TGCTATTAAG TGAAGTATAG GGACCCTGAG AAAAGCAGAA GCTGCTGTCT TTTGAGCTTA GACCATAACT GTTTGGGTTG GGGGGTCCTC ACATCCTTTT CTCTTTGAAG TTTCTTGGGT CAACCAGAGG GAACAGAAAC AAGCACCCCC CTC…
EPEC	bfpA	AAG16259.1	AB364244	ATGGTGCTTG CGCTTGCTGC AACCGTTACT GCCGGTGTGA TGTTTTACTA CCAGTCTGCG TCTGATTCCA ATAAGTCACA GAATGCCATT TCAGAAGTAA TGAGCGCAAC GTCTGCAATT AATGGTCTGT ATATTGGGCA GACCAGTTAT ACTGGATTGA ACTCAAATAT TTTGCTTAAC ACATCTGCAA TTCCGGATAA TTATAAAGAT ACAAAAAACA ATAAAATAAC CAATCCATTT GGGGGGGAAT TGGAGGTAGG TCCAGCGGCA ACAAATAACA CCAGCTTTGG TTACTATCTG ACACTTACCG GGCTGGATAA AGCAGCATGT GTTAGTCTTG CAACGTTGAA TTTAGGTACT TCA…
EPEC	eaeA	CAG34270.1	AB647605	GTTATCAATT TGACAAACCG TGGTCTCAGC AAATTGAGCC GCAGTATGTT AACGAGTTAA GAACATTATC AGGCAGCCGT TACGATCTGG TACAACGTAA TAACAATATT ATTCTGGAAT ACAAAAAGCA GGATATTCTT TCTTTGAGTA TTCCACATGA TATTAATGGT ACTGAACACA GTACGCAGAA GATTCAATTG AGCGTTAAGA GTAAGTACGG TCTGGATCGT ATCGTCTGGG ATGACAGTGC ATTACGCAGT CAGGGCGGTC AGATTCAGCA TAGCGGAAGC CAAAGCGCAC AAGATTACCA GGCTATTTTG CCTGCTTATG TGCAAGGTGG TAGCAATATT TATAAAGTGA CCG…
STEC	stx1	AAO19476.1	AY170851	ATGAAAAAAG TATTATTAAT AGCTGTTTCA CTTTCATTTC TTTCAGCAAG TGTTCTGGCA GCGCCAGATT GTGTAACCGG AAAGGTGGAG TATACAAAAT ATAATGATGA CGATACTTTT ACAGTTAAAG TGGCAGATAA AGAATTATTT ACTAACAGAT GGAATCTTCA GTCTCTTCTT CTAAGTGCAC AAATTACGGG GATGACGGTA ACTATTAAGA CCACTGCTTG TCATAATGGA GGGGGATTCA GCGAGGTTAT TTTTCGTTGA GTGAAGTATA GGGACCCTGA GAAAAGCAGA AGCTGCTGTC TTTTGAGCTT AGACCATAAC TGTTTGGGTT GGGGGGTCCT CACATCCTTT TCT…
STEC	stx2	ABR09935.1	EF441604	ATGAAGAAGA TGTTTATGGC GGTTTTATTT GCATTAGTTT CTGTTAATGC AATGGCGGCG GATTGCGCTA AAGGTAAAAT TGAGTTTTCC AAGTATAATG AGAATGATAC ATTCACAGTA AAAGTGGCCG GAAAAGAGTA CTGGACCAGT CGCTGGAATC TGCAACCGTT ACTGCAAAGT GCTCAGCTGA CAGGAATGAC TGTCACAATC AAATCCAGTA CCTGTGAATC AGGCTCCGGA TTTGCTGAAC TGCAGTTTAA TAATGACTGA GTGAAGTATA GGGACCCTGA GAAAAGCAGA AGCTGCTGTC TTTTGAGCTT AGACCATAAC TGTTTGGGTT GGGGGGTCCT CACATCCTTT TCT…
Campylobacter jejuni/coli	cdtA	YP_178099.1/WP_002854626.1	CP006851	TACTTTTCCT ACCAATCAAG AAATTCCAAG TTTAATTAGC GGTGCTGATT TAGTACCTAT TACTCCTATT ACCCCACCTT TAACTAGAAC AAGCAATAGT GCCAACAATA ATGCAGTAAA TGGGATCAAT CCTCGCTTTA AAGACGAAGC TTTTAATGAT GTTTTAATTT TTGAAAATCG CCCTGCGGTT TCTGATTTTT TAACCATTTT AGGCCCTAGC GGAGCAGCTT TAACGGTTTG GGCTTTAGCA CAAGGAAATT GGATTTGGGG CTATACTTTA ATCGATAGTA AAGGATTTGG CGATGCTAGA GTTTGGCAAC TTTTGCTTTA TCCTAATGAT TTTGCAATGA TTAAAAATGC CAA…
Clostridium difficile	tcdB	N/A	X92982	ATAAAATAAT GATGCCACAA GATGATTTAG TGATATCAGA ACGAGATTGG CATAATAATT CAATAGTTGG CGGTAAATGT GAAATCTGGA GAATGGAAGG TGGTTCAGGT CATACTGTAA CTGATGATAT AGATCACTTC TTTTCAGCAC CATCAATAAC ATATAGAGAG CCACACTTAT CTATATATGA CGTATTGGAA GTACAAAAAG AAGAACTTGA TTTGTCAAAA GATTTAATGG TATTACCTAA TGCTCCAAAT AGAGTATTTG CTTGGGAAAC AGGATGGACA CCAGGTTTAA GAAGCTTAGA AAATGATGGC ACAAAACTGT TAGACCGTAT AAGAGATAAC TATGAAGGTG AGT…	Had to increase GC content at both 3' and 5' ends (per IDT complexity specifications).
Clostridium perfringens	CPE	YP_473394	GQ225716	CTATAAATGT AAATTTTTCA GTTGGATTTA CTTCTGAATT TATACAAGCA TCTGTAGAAT ATGGATTTGG AATAACTATA GGAGAACAAA ATACAATAGA AAGATCTGTA TCTACAACTG CTGGTCCAAA TGAATATGTA TATTATAAGG TTTATGCAAC TTATAGAAAG TATCAAGCTA TTAGAATTTC TCATGGTAAT ATCTCTGATG ATGGATCAAT TTATAAATTA ACAGGAATAT GGCTTAGTAA AACATCTGCA GATAGCTTAG GAAATATTGA TCAAGGTTCA TTAATTGAAA CTGGTGAAAG ATGTGTTTTA ACAGTTCCAT CTACAGATAT AGAAAAAGAA ATCCTTGATT TAG…
Helicobacter pylori	ureA	YP_002265705.1/WP_000779224.1	CP001173	ATGAAACTCA CCCCAAAAGA GTTAGACAAG TTGATGCTCC ACTACGCTGG AGAATTGGCT AAAAAACGCA AAGAAAAAGG CATTAAGCTT AACTATGTAG AAGCGGTAGC TCTGATTAGT GCCCATATTA TGGAAGAAGC GAGAGCTGGT AAAAAGACTG CGGCTGAATT GATGCAAGAA GGGCGCACTC TTTTAAAACC AGATGATGTG ATGGATGGCG TGGCAAGCAT GATCCATGAA GTGGGTATTG AAGCGATGTT TCCTGATGGG ACTAAACTCG TAACCGTGCA TACCCCTATT GAGGCCAATG GTAAATTAGT TCCTGGTGAG TTGTTCTTAA AAAATGAAGA CATCACTATC AAC…
Salmonella spp.	invA	AAA16867.1	CP002614	ATCCTCAGTT TTTCAACGTT TCCTGCGGTA CTGTTAATTA CCACGCTCTT TCGTCTGGCA TTATCGATCA GTACCAGTCG TCTTATCTTG ATTGAAGCCG ATGCCGGTGA AATTATCGCC ACGTTCGGGC AATTCGTTAT TGGCGATAGC CTGGCGGTGG GTTTTGTTGT CTTCTCTATT GTCACCGTGG TCCAGTTTAT CGTTATTACC AAAGGTTCAG AACGTGTCGC GGAAGTCGCG GCCCGATTTT CTCTGGATGG TATGCCCGGT AAACAGATGA GTATTGATGC CGATTTGAAG GCCGGTATTA TTGATGCGGA TGCCGCGCGC GAACGGCGAA GCGTACTGGA AAGGGAAAGC CAG…
Shigella spp./EIEC	ipaH	YP_311504.1/WP_005154515.1	CP000038	CTGGAAAAAC TCAGTGCCTC TGCGGAGCTT CGACAGCAGT CTTTCACTGT TGCTGCTGAT GCCACTGAGA GCTGTGAGGA CCGTGTCGCG CTCACATGGA ACAATCTCCG GAAAACCCTC CTGGTCCATC AGGCATCAGA AGGCCTTTTC GATAATGATA CCGGCGCTCT GCTCTCCCTG GGCAGGGAAA TGTTCCGCCT CGAAATTCTG GAGGACATTG CCCGGGATAA AGTCAGAACT CTCCATTTTG TGGATGAGAT AGAAGTCTAC CTGGCCTTCC AGACCATGCT CGCAGAGAAA CTTCAGCTCT CCACTGCCGT GAAGGAAATG CGTTTCTATG GCGTGTCGGG AGTGACAGCA AAT…
Vibrio cholerae	tcpA	YP_001216309.1/WP_001176378.1	CP001235	ATGCAATTAT TAAAACAGCT TTTTAAGAAG AAATTTGTAA AAGAAGAACA CGATAAGAAA ACCGGTCAAG AGGGTATGAC ATTACTCGAA GTGATCATCG TTCTAGGCAT TATGGGGGTG GTTTCGGCGG GGGTTGTTAC TCTGGCGCAG CGTGCGATTG ATTCGCAGAA TATGACCAAG GCCGCGCAAA GTCTCAATAG TATCCAAGTT GCACTGACAC AGACATACCG TGGTCTAGGT AATTATCCAG CAACAGCTGA TGCGACAGCT GCTAGTAAGC TAACTTCAGG CTTGGTTAGT TTAGGTAAAA TATCATCCGA TGAGGCAAAA AACCCATTCA TTGGTACAAA TATGAATATT TTT…
Yersinia enterocolitica	yadA	NP_863557.1	AM286416	AGATTTTAAG ATCAGTGTCT CTGCGGCATT AATATCTGCG TTGTTCTCAT CTCCATATGC ATTTGCCAAT AATGACGAGG TTCATTTTAC AGCAGTTCAA ATAAGCCCAA ATGCTGATCC TGATTCGCAT GTTGTGATAT TTCAACCAGC AGCAGAAGCC CTAGGCGGGA CCAATGCTCT CGCTAAGAGT ATCCATAGCA TTGCGGTTGG TGCTAGTGCT GAAGCAGCGA AACAAGCTGC AGTTGCTGTG GGCGCTGGTT CAATTGCAAC AGGAGTTAAT TCTGTTGCAA TTGGTCCTTT AAGTAAGGCA TTGGGAGATT CGGCAGTTAC TTATGGGGCA GCTAGTACCG CCCAGAAAGA TGG…
Cryptosporidium spp.	18S rRNA	N/A	AF164102	CTTGTCTCAA AGATTAAGCC ATGCATGTCT AAGTATAAAC TTTTATACGG TTAAACTGCG AATGGCTCAT TATAACAGTT ATAGTTTACT TGATAATCTT TACTTACATG GATAACCGTG GTAATTCTAG AGCTAATACA TGCGAAAAAA CTCGACTTTA TGGAAGGGTT GTATTTATTA GATAAAGAAC CAATATAATT GGTGACTCAT AATAACTTTA CGGATCACAT TAAATGTGAC ATATCATTCA AGTTTCTGAC CTATCAGCTT TAGACGGTAG GGTATTGGCC TACCGTGGCA ATGACGGGTA ACGGGGAATT AGGGTTCGAT TCCGGAGAGG GAGCCTGAGA AACGGCTACC ACA…
Entamoeba histolytica	18S rRNA	N/A	Y11272	TTTACTCAAC TCTAGAGTTA TGTGTCGTCA CTACCTCTTC AATTCGAAAG TGGGTAATTT ACGCGCCTGC TGCCTTCCTT AGAAGTGGTA GCCATCTGTA AAGCTCCCTC TCCGATGTCG AACCCCAATT CCTCGTTATC CGTTATAATC TTGGTAGTCC TCGATACTAC CAACTGATTG ATAGATCAGA AATTCTCATT GGTTACTTGT TAAACACTGT GTGTTCTACA ATTGTCGTGG CATCCTAACT CACTTAGAAT GTCATTTCTC AATTCATTGA ATGAATTGGC CATTTTGTAC TAATACAAAC TGGATCGTCT CAAGTATTAT CTTTATCATT CACAAAGCTA TCCTTGTATT TTA…	Had to increase GC content from 27% to 28%, around position 390 (per IDT complexity specifications).
Giardia lamblia	18S rRNA	N/A	AACB02000103	CATCCGGTCG ATCCTGCCGG AGCGCGACGC TCTCCCCAAG GACGAAGCCA TGCATGCCCG CTCACCCGGG ACGCGGCGGA CGGCTCAGGA CAACGGTTGC ACCCCCCGCG GCGGTCCCTG CTAGCCGGAC ACCGCTGGCA ACCCGGCGCC AAGACGTGCG CGCAAGGTAT TTACACATAT GGATAGCAGC GTAACGCAGC GACGGCTTGC CCGGGCTTTT GGGACATCAC CCGGTCGGCG ATGTCGCGGA TTACCGAGGG CAAGACGCCT GTCGGAGAAT CAGGGTTCGA CTCCGGAGAT TATGCCTGCG AGACGGCCCA TACATCCAAG GACGGCAGCA GGCGCGGAAC TTGCCCAATG CGA…	Had to modify CG content overall below 68% and specifically from position 165-205 where the GC content was 95% (per IDT complexity specifications).
Ascaris lumbricoides	ITS1	N/A	EF153619	CAGAAAAAAA AAAGTCTCCG AACGTGCACA TAAGTACTAT TTGCGCGTAT ACGTGAGCCA CATAGTAAAT TGCACACAAA TGTGGTGATG TAATAGCAGT CGGCGGTTTC TTTTTTTTTG GCGGACAATT GCATGCGATT TGCTATGTGT TGAGGGAGAA TAGGTGGCAT GTTGGGCTTG TTAGAAAGGC ATGCCGCTAG CGCTTATTTT CCCGCTATTT CGTAACAACG GTGTCCATTT TGGCGTCTAC GCTTCACCGA GCTATCGCCT GGACCGTCGG TAGCGATGAA AGGTGGAGAG AAAGCTCCTC GTTTCGAGTC GAGTAGACTC AATGAGCCTC AGCTTGGAGG CCGCCAACAC TCA…	Had to increase GC content above 28% (was at 27%) from position 352 (per IDT complexity specifications).
Trichuris trichiura	18S rRNA	N/A	GQ352548	CAGCAGTCGT TGTTCGCTAG AACTGATGTC CACTTGGATA ACTATGGAAA TGCTAGAGCT AATACATGCC TCGAAGCTCA GTCGCGCGCT GCGCGTCGGA GCGCGTTTAT TTGAACAAAA CCAATCGGAC GCAGGCTAGC TATTGGTCTG AGTCCGCGAA ATGTTGGTGA ATCGGAATAA CTATGCTGAT CGCACGGTCC AGTACCGGCG ACGATGCTTT GAAACGACTT GCTCATCAAC TTTCGATGGT ACGCTACGTG CTTACCATGG TGACAACGGT TAACGGAGAA TCAGGGTTCG GCTCCGGAGA GGGAGCCTGA GAAACGGCTA CCACATCCAA GGAAGGCAGC AGGCACGCAA ATT…
Total Bacteria	16S rRNA	N/A	AEZK02000026	GGTTAAAACT CAAATGAATT GACGGGGGCC CGCACAAGCG GTGGAGCATG TGGTTTAATT CGATGCAACG CGAAGAACCT TACCTGGTCT TGACATCCAC AGAACTTTCC AGAGATGGAT TGGTGCCTTC GGGAACTGTG AGACAGGTGC TGCATGGCTG TCGTCAGCTC GTGTTGTGAA ATGTTGGGTT AAGTCCGGCA ACGAGCGCAA CCCTTATCCT TTGTTGCCAG CGGTCCGGCC GGGAACTCAA AGGAGACTGC CAGTGATAAA CTGGAGGAAG GTGGGGATGA CGTCAAGTCA TCATGGCCCT TACGACCAGG GCTACACACG TGCTACAATG GCGCATACAA AGAGAAGCGA CCT…
Total Archaea	16S rRNA	N/A	NR_118367	CTATTAGACT TGAGATCGGG AGAGGTTAGA GGTACTCCCA GGGTAGAGGT GAAATTCTGT AATCCTGGGA GGACCGCCTG TTGCGAAGGC GTCTGACTGG GACGATTCTG ACGGTGAGGG ACGAAAGCTA GGGGCGCGAA CCGGATTAGA TACCCGGGTA GTCCTAGCTG TAAACGATGC GGACTTGGTG TTGGGGTGGC TTTGAGCTGT CCCAGTGCCG AAGGGAAGCT GTTAAGTCCG CCGCCTGGGA AGTACGGTCG CAAGACTGAA ACTTAAAGGA ATTGGCGGGG GAGCACCACA ACGCGTGGAG CCTGCGGTTT AATTGGATTC AACGCCGGAC ATCTCACCAG AGGCGACAGC TGT…
Total Fungi	ITS1	N/A	KC905068	CCTGCCCTTT GTACACACCG CCCGTCGCTA CTACCGATTG AATGGCTTAG TGAGGCCTCC GGATTGGTTT AGGAAAGGGG GCAACCTCAT TCTGGAACCG AGAAGCTGGT CAAACTTGGT CATTTAGAGG AAGTAAAAGT CGTAACAAGG TTTCCGTAGG TGAACCTGCG GAAGGATCAT TACTGATTTG CTTAATTGCA CCACATGTGT TTTTCTTTGA AACAAACTTG CTTTGGCGGT GGGCCCAGCC TGCCGCCAGA GGTCTAAACT TACAACCAAT TTTTTATCAA CTTGTCACAC CAGATTATTA CTAATAGTCA AAACTTTCAA CAACGGATCT CTTGGTTCTC GCATCGATGA AGA…
PhHV	gB	N/A	Z68147	AATGGCACCT AGTCTAGGAA CCGAACTAGG TAGGTACGCA CGGTAGTATT CCTTATGAGT ATCCTGGTTA TACAATGCGT TCCAACAACA CAACCTACTG AATCTACACC ACCAATTACT CCTAGTCCAC CACCGAAAAA CTCATCTTCG ACCCCTGAGT TGAGTGATGC TATGAGAGAA ATTTTGGGCG AATCACAGAT TGAATCTGAT GATACAGCAA CATTTTTTAT GTGTCCGCCA CCATCTGGAT CAACGTTGGT ACGTTTGGAA CCGCCTCGGG CTTGTCCTAA TTACAAACTT GGTAAAAACT TTACAGCAGG TATTGCTGTA ATGGCTAAAG ACCCTATATC TCCATATGAA TCT…
N/A: not applicable as primers were obtained from literature and not designed in this study
